# Supplementary material for: Genome-wide identification of the DUF668 gene family in cotton and expression profiling analysis of GhDUF668 in Gossypium hirsutum under adverse stress
Source: PubMed Central journal article supplement (PMC8162019; doi:10.1186/s12864-021-07716-w), 2021-05-27
Supplement: 12864_2021_7716_MOESM1_ESM.pdf [file 12864_2021_7716_MOESM1_ESM.pdf]

## G. hirsutum

Gh\_DUF668-01

**Protein Classification**  
DUF668 and DUF3475 domain-containing protein (domain architecture ID 10571731)  
DUF668 and DUF3475 domain-containing protein

**Graphical summary**  Zoom to residue level [show extra options >](#)

Query seq. Specific hits Superfamilies

[Search for similar domain architectures](#) [Refine search](#)

**List of domain hits**

| Name        | Accession | Description                                                                                     | Interval | E-value  |
|-------------|-----------|-------------------------------------------------------------------------------------------------|----------|----------|
| [+] DUF668  | pfam05003 | Protein of unknown function (DUF668); Uncharacterized plant protein.                            | 433-522  | 1.46e-48 |
| [+] DUF3475 | pfam11961 | Domain of unknown function (DUF3475); This presumed domain is functionally uncharacterized. ... | 28-84    | 1.24e-25 |

Gh\_DUF668-02

**Protein Classification**  
DUF668 and DUF3475 domain-containing protein (domain architecture ID 10571731)  
DUF668 and DUF3475 domain-containing protein

**Graphical summary**  Zoom to residue level [show extra options >](#)

Query seq. Specific hits Superfamilies

[Search for similar domain architectures](#) [Refine search](#)

**List of domain hits**

| Name        | Accession | Description                                                                                     | Interval | E-value  |
|-------------|-----------|-------------------------------------------------------------------------------------------------|----------|----------|
| [+] DUF668  | pfam05003 | Protein of unknown function (DUF668); Uncharacterized plant protein.                            | 401-490  | 1.85e-44 |
| [+] DUF3475 | pfam11961 | Domain of unknown function (DUF3475); This presumed domain is functionally uncharacterized. ... | 32-87    | 8.74e-25 |

Gh\_DUF668-03

**Protein Classification**  
DUF668 and DUF3475 domain-containing protein (domain architecture ID 10571731)  
DUF668 and DUF3475 domain-containing protein

**Graphical summary**  Zoom to residue level [show extra options >](#)

Query seq. Specific hits Superfamilies

[Search for similar domain architectures](#) [Refine search](#)

**List of domain hits**

| Name        | Accession | Description                                                                                     | Interval | E-value  |
|-------------|-----------|-------------------------------------------------------------------------------------------------|----------|----------|
| [+] DUF668  | pfam05003 | Protein of unknown function (DUF668); Uncharacterized plant protein.                            | 313-402  | 1.24e-29 |
| [+] DUF3475 | pfam11961 | Domain of unknown function (DUF3475); This presumed domain is functionally uncharacterized. ... | 44-100   | 1.23e-19 |

Gh\_DUF668-04

**Protein Classification**  
DUF668 and DUF3475 domain-containing protein (domain architecture ID 10571731)  
DUF668 and DUF3475 domain-containing protein

**Graphical summary**  Zoom to residue level [show extra options >](#)

Query seq. Specific hits Superfamilies

[Search for similar domain architectures](#) [Refine search](#)

**List of domain hits**

| Name        | Accession | Description                                                                                     | Interval | E-value  |
|-------------|-----------|-------------------------------------------------------------------------------------------------|----------|----------|
| [+] DUF668  | pfam05003 | Protein of unknown function (DUF668); Uncharacterized plant protein.                            | 426-513  | 1.69e-49 |
| [+] DUF3475 | pfam11961 | Domain of unknown function (DUF3475); This presumed domain is functionally uncharacterized. ... | 47-103   | 1.02e-23 |

Gh\_DUF668-05

**Protein Classification**

**DUF668 and DUF3475 domain-containing protein** (domain architecture ID 10571731)  
 DUF668 and DUF3475 domain-containing protein

**Graphical summary**  Zoom to residue level [show extra options >](#)

Query seq.  
 Specific hits  
 Superfamilies

[Search for similar domain architectures](#) [Refine search](#)

**List of domain hits**

| Name        | Accession | Description                                                                                     | Interval | E-value  |
|-------------|-----------|-------------------------------------------------------------------------------------------------|----------|----------|
| [+] DUF668  | pfam05003 | Protein of unknown function (DUF668); Uncharacterized plant protein.                            | 383-466  | 3.72e-46 |
| [+] DUF3475 | pfam11961 | Domain of unknown function (DUF3475); This presumed domain is functionally uncharacterized. ... | 162-218  | 1.90e-25 |

Gh\_DUF668-06

**Protein Classification**

**DUF668 domain-containing protein** (domain architecture ID 10523325)  
 DUF668 domain-containing protein

**Graphical summary**  Zoom to residue level [show extra options >](#)

Query seq.  
 Specific hits  
 Superfamilies

[Search for similar domain architectures](#) [Refine search](#)

**List of domain hits**

| Name       | Accession | Description                                                          | Interval | E-value  |
|------------|-----------|----------------------------------------------------------------------|----------|----------|
| [+] DUF668 | pfam05003 | Protein of unknown function (DUF668); Uncharacterized plant protein. | 116-199  | 3.99e-41 |

Gh\_DUF668-07

**Protein Classification**

**DUF668 and DUF3475 domain-containing protein** (domain architecture ID 10571731)  
 DUF668 and DUF3475 domain-containing protein

**Graphical summary**  Zoom to residue level [show extra options >](#)

Query seq.  
 Specific hits  
 Superfamilies

[Search for similar domain architectures](#) [Refine search](#)

**List of domain hits**

| Name        | Accession | Description                                                                                     | Interval | E-value  |
|-------------|-----------|-------------------------------------------------------------------------------------------------|----------|----------|
| [+] DUF668  | pfam05003 | Protein of unknown function (DUF668); Uncharacterized plant protein.                            | 355-444  | 5.86e-29 |
| [+] DUF3475 | pfam11961 | Domain of unknown function (DUF3475); This presumed domain is functionally uncharacterized. ... | 33-89    | 5.81e-19 |

Gh\_DUF668-08

**Protein Classification**

**DUF668 and DUF3475 domain-containing protein** (domain architecture ID 10571731)  
 DUF668 and DUF3475 domain-containing protein

**Graphical summary**  Zoom to residue level [show extra options >](#)

Query seq.  
 Specific hits  
 Superfamilies

[Search for similar domain architectures](#) [Refine search](#)

**List of domain hits**

| Name        | Accession | Description                                                                                     | Interval | E-value  |
|-------------|-----------|-------------------------------------------------------------------------------------------------|----------|----------|
| [+] DUF668  | pfam05003 | Protein of unknown function (DUF668); Uncharacterized plant protein.                            | 355-438  | 1.12e-39 |
| [+] DUF3475 | pfam11961 | Domain of unknown function (DUF3475); This presumed domain is functionally uncharacterized. ... | 136-192  | 4.99e-23 |

Gh\_DUF668-09

**Protein Classification**  
**DUF668 and DUF3475 domain-containing protein** (domain architecture ID 10571731)  
 DUF668 and DUF3475 domain-containing protein

**Graphical summary**  Zoom to residue level [show extra options >](#)

Query seq.  
 Specific hits  
 Superfamilies

[Search for similar domain architectures](#) [Refine search](#)

**List of domain hits**

| Name        | Accession | Description                                                                                     | Interval | E-value  |
|-------------|-----------|-------------------------------------------------------------------------------------------------|----------|----------|
| [+] DUF668  | pfam05003 | Protein of unknown function (DUF668); Uncharacterized plant protein.                            | 381-464  | 3.78e-47 |
| [+] DUF3475 | pfam11961 | Domain of unknown function (DUF3475); This presumed domain is functionally uncharacterized. ... | 160-216  | 5.52e-26 |

Gh\_DUF668-10

**Protein Classification**  
**DUF668 and DUF3475 domain-containing protein** (domain architecture ID 10571731)  
 DUF668 and DUF3475 domain-containing protein

**Graphical summary**  Zoom to residue level [show extra options >](#)

Query seq.  
 Specific hits  
 Superfamilies

[Search for similar domain architectures](#) [Refine search](#)

**List of domain hits**

| Name        | Accession | Description                                                                                     | Interval | E-value  |
|-------------|-----------|-------------------------------------------------------------------------------------------------|----------|----------|
| [+] DUF668  | pfam05003 | Protein of unknown function (DUF668); Uncharacterized plant protein.                            | 422-511  | 5.82e-48 |
| [+] DUF3475 | pfam11961 | Domain of unknown function (DUF3475); This presumed domain is functionally uncharacterized. ... | 28-84    | 5.74e-23 |

Gh\_DUF668-11

**Protein Classification**  
**DUF668 and DUF3475 domain-containing protein** (domain architecture ID 10571731)  
 DUF668 and DUF3475 domain-containing protein

**Graphical summary**  Zoom to residue level [show extra options >](#)

Query seq.  
 Specific hits  
 Superfamilies

[Search for similar domain architectures](#) [Refine search](#)

**List of domain hits**

| Name        | Accession | Description                                                                                     | Interval | E-value  |
|-------------|-----------|-------------------------------------------------------------------------------------------------|----------|----------|
| [+] DUF668  | pfam05003 | Protein of unknown function (DUF668); Uncharacterized plant protein.                            | 359-442  | 9.28e-47 |
| [+] DUF3475 | pfam11961 | Domain of unknown function (DUF3475); This presumed domain is functionally uncharacterized. ... | 138-194  | 1.11e-21 |

Gh\_DUF668-12

**Protein Classification**  
**DUF668 and DUF3475 domain-containing protein** (domain architecture ID 10571731)  
 DUF668 and DUF3475 domain-containing protein

**Graphical summary**  Zoom to residue level [show extra options >](#)

Query seq.  
 Specific hits  
 Superfamilies

[Search for similar domain architectures](#) [Refine search](#)

**List of domain hits**

| Name        | Accession | Description                                                                                     | Interval | E-value  |
|-------------|-----------|-------------------------------------------------------------------------------------------------|----------|----------|
| [+] DUF668  | pfam05003 | Protein of unknown function (DUF668); Uncharacterized plant protein.                            | 295-381  | 2.16e-42 |
| [+] DUF3475 | pfam11961 | Domain of unknown function (DUF3475); This presumed domain is functionally uncharacterized. ... | 32-88    | 6.39e-22 |

Gh\_DUF668-13

**Protein Classification**  
DUF668 and DUF3475 domain-containing protein (domain architecture ID 10571731)  
DUF668 and DUF3475 domain-containing protein

**Graphical summary**  Zoom to residue level [show extra options >](#)

Query seq.  
Specific hits  
Superfamilies

[Search for similar domain architectures](#) [Refine search](#)

**List of domain hits**

| Name        | Accession | Description                                                                                     | Interval | E-value  |
|-------------|-----------|-------------------------------------------------------------------------------------------------|----------|----------|
| [+] DUF668  | pfam05003 | Protein of unknown function (DUF668); Uncharacterized plant protein.                            | 390-479  | 4.25e-41 |
| [+] DUF3475 | pfam11961 | Domain of unknown function (DUF3475); This presumed domain is functionally uncharacterized. ... | 34-90    | 7.99e-22 |

Gh\_DUF668-14

**Protein Classification**  
DUF668 and DUF3475 domain-containing protein (domain architecture ID 10571731)  
DUF668 and DUF3475 domain-containing protein

**Graphical summary**  Zoom to residue level [show extra options >](#)

Query seq.  
Specific hits  
Superfamilies

[Search for similar domain architectures](#) [Refine search](#)

**List of domain hits**

| Name        | Accession | Description                                                                                     | Interval | E-value  |
|-------------|-----------|-------------------------------------------------------------------------------------------------|----------|----------|
| [+] DUF668  | pfam05003 | Protein of unknown function (DUF668); Uncharacterized plant protein.                            | 424-511  | 1.53e-49 |
| [+] DUF3475 | pfam11961 | Domain of unknown function (DUF3475); This presumed domain is functionally uncharacterized. ... | 48-104   | 6.88e-24 |

Gh\_DUF668-15

**Protein Classification**  
DUF668 and DUF3475 domain-containing protein (domain architecture ID 10571731)  
DUF668 and DUF3475 domain-containing protein

**Graphical summary**  Zoom to residue level [show extra options >](#)

Query seq.  
Specific hits  
Superfamilies

[Search for similar domain architectures](#) [Refine search](#)

**List of domain hits**

| Name        | Accession | Description                                                                                     | Interval | E-value  |
|-------------|-----------|-------------------------------------------------------------------------------------------------|----------|----------|
| [+] DUF668  | pfam05003 | Protein of unknown function (DUF668); Uncharacterized plant protein.                            | 307-392  | 1.49e-44 |
| [+] DUF3475 | pfam11961 | Domain of unknown function (DUF3475); This presumed domain is functionally uncharacterized. ... | 38-94    | 4.53e-26 |

Gh\_DUF668-16

**Protein Classification**  
DUF668 and DUF3475 domain-containing protein (domain architecture ID 10571731)  
DUF668 and DUF3475 domain-containing protein

**Graphical summary**  Zoom to residue level [show extra options >](#)

Query seq.  
Specific hits  
Superfamilies

[Search for similar domain architectures](#) [Refine search](#)

**List of domain hits**

| Name        | Accession | Description                                                                                     | Interval | E-value  |
|-------------|-----------|-------------------------------------------------------------------------------------------------|----------|----------|
| [+] DUF668  | pfam05003 | Protein of unknown function (DUF668); Uncharacterized plant protein.                            | 238-324  | 2.18e-41 |
| [+] DUF3475 | pfam11961 | Domain of unknown function (DUF3475); This presumed domain is functionally uncharacterized. ... | 26-82    | 3.26e-20 |

Gh\_DUF668-17

**Protein Classification**

**DUF668 and DUF3475 domain-containing protein** (domain architecture ID 10571731)  
 DUF668 and DUF3475 domain-containing protein

**Graphical summary**  Zoom to residue level [show extra options >](#)

Query seq.   
 Specific hits   
 Superfamilies

[Search for similar domain architectures](#) [Refine search](#)

**List of domain hits**

| Name        | Accession | Description                                                                                     | Interval | E-value  |
|-------------|-----------|-------------------------------------------------------------------------------------------------|----------|----------|
| [+] DUF668  | pfam05003 | Protein of unknown function (DUF668); Uncharacterized plant protein.                            | 335-425  | 4.79e-27 |
| [+] DUF3475 | pfam11961 | Domain of unknown function (DUF3475); This presumed domain is functionally uncharacterized. ... | 46-102   | 1.91e-19 |

Gh\_DUF668-18

**Protein Classification**

**DUF668 and DUF3475 domain-containing protein** (domain architecture ID 10571731)  
 DUF668 and DUF3475 domain-containing protein

**Graphical summary**  Zoom to residue level [show extra options >](#)

Query seq.   
 Specific hits   
 Superfamilies

[Search for similar domain architectures](#) [Refine search](#)

**List of domain hits**

| Name        | Accession | Description                                                                                     | Interval | E-value  |
|-------------|-----------|-------------------------------------------------------------------------------------------------|----------|----------|
| [+] DUF668  | pfam05003 | Protein of unknown function (DUF668); Uncharacterized plant protein.                            | 433-522  | 2.45e-48 |
| [+] DUF3475 | pfam11961 | Domain of unknown function (DUF3475); This presumed domain is functionally uncharacterized. ... | 28-84    | 1.38e-25 |

Gh\_DUF668-19

**Protein Classification**

**DUF668 and DUF3475 domain-containing protein** (domain architecture ID 10571731)  
 DUF668 and DUF3475 domain-containing protein

**Graphical summary**  Zoom to residue level [show extra options >](#)

Query seq.   
 Specific hits   
 Superfamilies

[Search for similar domain architectures](#) [Refine search](#)

**List of domain hits**

| Name        | Accession | Description                                                                                     | Interval | E-value  |
|-------------|-----------|-------------------------------------------------------------------------------------------------|----------|----------|
| [+] DUF668  | pfam05003 | Protein of unknown function (DUF668); Uncharacterized plant protein.                            | 401-490  | 1.51e-44 |
| [+] DUF3475 | pfam11961 | Domain of unknown function (DUF3475); This presumed domain is functionally uncharacterized. ... | 32-87    | 3.01e-24 |

Gh\_DUF668-20

**Protein Classification**

**DUF668 and DUF3475 domain-containing protein** (domain architecture ID 10571731)  
 DUF668 and DUF3475 domain-containing protein

**Graphical summary**  Zoom to residue level [show extra options >](#)

Query seq.   
 Specific hits   
 Superfamilies

[Search for similar domain architectures](#) [Refine search](#)

**List of domain hits**

| Name        | Accession | Description                                                                                     | Interval | E-value  |
|-------------|-----------|-------------------------------------------------------------------------------------------------|----------|----------|
| [+] DUF668  | pfam05003 | Protein of unknown function (DUF668); Uncharacterized plant protein.                            | 313-403  | 5.64e-28 |
| [+] DUF3475 | pfam11961 | Domain of unknown function (DUF3475); This presumed domain is functionally uncharacterized. ... | 44-100   | 1.74e-20 |

Gh\_DUF668-21

**Protein Classification**  
**DUF668 and DUF3475 domain-containing protein** (domain architecture ID 10571731)  
 DUF668 and DUF3475 domain-containing protein

**Graphical summary**  Zoom to residue level [show extra options >](#)

Query seq.  
 Specific hits  
 Superfamilies

[Search for similar domain architectures](#) [Refine search](#)

**List of domain hits**

| Name        | Accession | Description                                                                                     | Interval | E-value  |
|-------------|-----------|-------------------------------------------------------------------------------------------------|----------|----------|
| [+] DUF668  | pfam05003 | Protein of unknown function (DUF668); Uncharacterized plant protein.                            | 427-514  | 2.42e-49 |
| [+] DUF3475 | pfam11961 | Domain of unknown function (DUF3475); This presumed domain is functionally uncharacterized. ... | 47-103   | 1.09e-23 |

Gh\_DUF668-22

**Protein Classification**  
**DUF668 and DUF3475 domain-containing protein** (domain architecture ID 10571731)  
 DUF668 and DUF3475 domain-containing protein

**Graphical summary**  Zoom to residue level [show extra options >](#)

Query seq.  
 Specific hits  
 Superfamilies

[Search for similar domain architectures](#) [Refine search](#)

**List of domain hits**

| Name        | Accession | Description                                                                                     | Interval | E-value  |
|-------------|-----------|-------------------------------------------------------------------------------------------------|----------|----------|
| [+] DUF668  | pfam05003 | Protein of unknown function (DUF668); Uncharacterized plant protein.                            | 383-466  | 3.72e-46 |
| [+] DUF3475 | pfam11961 | Domain of unknown function (DUF3475); This presumed domain is functionally uncharacterized. ... | 162-218  | 3.09e-24 |

Gh\_DUF668-23

**Protein Classification**  
**DUF668 and DUF3475 domain-containing protein** (domain architecture ID 10571731)  
 DUF668 and DUF3475 domain-containing protein

**Graphical summary**  Zoom to residue level [show extra options >](#)

Query seq.  
 Specific hits  
 Superfamilies

[Search for similar domain architectures](#) [Refine search](#)

**List of domain hits**

| Name        | Accession | Description                                                                                     | Interval | E-value  |
|-------------|-----------|-------------------------------------------------------------------------------------------------|----------|----------|
| [+] DUF668  | pfam05003 | Protein of unknown function (DUF668); Uncharacterized plant protein.                            | 357-440  | 2.38e-39 |
| [+] DUF3475 | pfam11961 | Domain of unknown function (DUF3475); This presumed domain is functionally uncharacterized. ... | 137-193  | 2.75e-22 |

Gh\_DUF668-24

**Protein Classification**  
**DUF668 domain-containing protein** (domain architecture ID 10523325)  
 DUF668 domain-containing protein

**Graphical summary**  Zoom to residue level [show extra options >](#)

Query seq.  
 Specific hits  
 Superfamilies

[Search for similar domain architectures](#) [Refine search](#)

**List of domain hits**

| Name       | Accession | Description                                                          | Interval | E-value  |
|------------|-----------|----------------------------------------------------------------------|----------|----------|
| [+] DUF668 | pfam05003 | Protein of unknown function (DUF668); Uncharacterized plant protein. | 46-135   | 4.05e-48 |

Gh\_DUF668-25

**Protein Classification**  
DUF668 and DUF3475 domain-containing protein (domain architecture ID 10571731)  
DUF668 and DUF3475 domain-containing protein

**Graphical summary**  Zoom to residue level [show extra options >](#)

Query seq. Specific hits Superfamilies

**List of domain hits**

| Name        | Accession | Description                                                                                     | Interval | E-value  |
|-------------|-----------|-------------------------------------------------------------------------------------------------|----------|----------|
| [+] DUF668  | pfam05003 | Protein of unknown function (DUF668); Uncharacterized plant protein.                            | 359-448  | 6.37e-31 |
| [+] DUF3475 | pfam11961 | Domain of unknown function (DUF3475); This presumed domain is functionally uncharacterized. ... | 33-89    | 7.80e-19 |

Gh\_DUF668-26

**Protein Classification**  
DUF668 and DUF3475 domain-containing protein (domain architecture ID 10571731)  
DUF668 and DUF3475 domain-containing protein

**Graphical summary**  Zoom to residue level [show extra options >](#)

Query seq. Specific hits Superfamilies

**List of domain hits**

| Name        | Accession | Description                                                                                     | Interval | E-value  |
|-------------|-----------|-------------------------------------------------------------------------------------------------|----------|----------|
| [+] DUF668  | pfam05003 | Protein of unknown function (DUF668); Uncharacterized plant protein.                            | 355-438  | 1.21e-39 |
| [+] DUF3475 | pfam11961 | Domain of unknown function (DUF3475); This presumed domain is functionally uncharacterized. ... | 137-192  | 3.87e-22 |

Gh\_DUF668-27

**Protein Classification**  
DUF668 and DUF3475 domain-containing protein (domain architecture ID 10571731)  
DUF668 and DUF3475 domain-containing protein

**Graphical summary**  Zoom to residue level [show extra options >](#)

Query seq. Specific hits Superfamilies

**List of domain hits**

| Name        | Accession | Description                                                                                     | Interval | E-value  |
|-------------|-----------|-------------------------------------------------------------------------------------------------|----------|----------|
| [+] DUF668  | pfam05003 | Protein of unknown function (DUF668); Uncharacterized plant protein.                            | 381-464  | 3.16e-45 |
| [+] DUF3475 | pfam11961 | Domain of unknown function (DUF3475); This presumed domain is functionally uncharacterized. ... | 160-216  | 4.54e-26 |

Gh\_DUF668-28

**Protein Classification**  
DUF668 and DUF3475 domain-containing protein (domain architecture ID 10571731)  
DUF668 and DUF3475 domain-containing protein

**Graphical summary**  Zoom to residue level [show extra options >](#)

Query seq. Specific hits Superfamilies

**List of domain hits**

| Name        | Accession | Description                                                                                     | Interval | E-value  |
|-------------|-----------|-------------------------------------------------------------------------------------------------|----------|----------|
| [+] DUF668  | pfam05003 | Protein of unknown function (DUF668); Uncharacterized plant protein.                            | 359-442  | 5.30e-45 |
| [+] DUF3475 | pfam11961 | Domain of unknown function (DUF3475); This presumed domain is functionally uncharacterized. ... | 138-194  | 1.63e-21 |

Gh\_DUF668-29

**Protein Classification**  
**DUF668 and DUF3475 domain-containing protein** (domain architecture ID 10571731)  
 DUF668 and DUF3475 domain-containing protein

**Graphical summary**  Zoom to residue level [show extra options >](#)

Query seq.  
 Specific hits  
 Superfamilies

[Search for similar domain architectures](#) [Refine search](#)

**List of domain hits**

| Name        | Accession | Description                                                                                     | Interval | E-value  |
|-------------|-----------|-------------------------------------------------------------------------------------------------|----------|----------|
| [+] DUF668  | pfam05003 | Protein of unknown function (DUF668); Uncharacterized plant protein.                            | 296-382  | 5.39e-44 |
| [+] DUF3475 | pfam11961 | Domain of unknown function (DUF3475); This presumed domain is functionally uncharacterized. ... | 32-88    | 2.32e-23 |

Gh\_DUF668-30

**Protein Classification**  
**DUF668 and DUF3475 domain-containing protein** (domain architecture ID 10571731)  
 DUF668 and DUF3475 domain-containing protein

**Graphical summary**  Zoom to residue level [show extra options >](#)

Query seq.  
 Specific hits  
 Superfamilies

[Search for similar domain architectures](#) [Refine search](#)

**List of domain hits**

| Name        | Accession | Description                                                                                     | Interval | E-value  |
|-------------|-----------|-------------------------------------------------------------------------------------------------|----------|----------|
| [+] DUF668  | pfam05003 | Protein of unknown function (DUF668); Uncharacterized plant protein.                            | 390-479  | 1.56e-37 |
| [+] DUF3475 | pfam11961 | Domain of unknown function (DUF3475); This presumed domain is functionally uncharacterized. ... | 34-89    | 1.22e-20 |

Gh\_DUF668-31

**Protein Classification**  
**DUF668 and DUF3475 domain-containing protein** (domain architecture ID 10571731)  
 DUF668 and DUF3475 domain-containing protein

**Graphical summary**  Zoom to residue level [show extra options >](#)

Query seq.  
 Specific hits  
 Superfamilies

[Search for similar domain architectures](#) [Refine search](#)

**List of domain hits**

| Name        | Accession | Description                                                                                     | Interval | E-value  |
|-------------|-----------|-------------------------------------------------------------------------------------------------|----------|----------|
| [+] DUF668  | pfam05003 | Protein of unknown function (DUF668); Uncharacterized plant protein.                            | 307-392  | 1.50e-44 |
| [+] DUF3475 | pfam11961 | Domain of unknown function (DUF3475); This presumed domain is functionally uncharacterized. ... | 38-94    | 2.74e-26 |

Gh\_DUF668-32

**Protein Classification**  
**DUF3475 and DUF668 domain-containing protein** (domain architecture ID 10571716)  
 DUF3475 and DUF668 domain-containing protein

**Graphical summary**  Zoom to residue level [show extra options >](#)

Query seq.  
 Specific hits  
 Superfamilies

[Search for similar domain architectures](#) [Refine search](#)

**List of domain hits**

| Name                    | Accession | Description                                                                                     | Interval | E-value  |
|-------------------------|-----------|-------------------------------------------------------------------------------------------------|----------|----------|
| [+] DUF3475             | pfam11961 | Domain of unknown function (DUF3475); This presumed domain is functionally uncharacterized. ... | 26-82    | 3.65e-19 |
| [+] DUF668 super family | cl04883   | Protein of unknown function (DUF668); Uncharacterized plant protein.                            | 238-278  | 6.87e-18 |



*G. barbadense*

Gb\_DUF668-01

**Protein Classification**  
**DUF668 and DUF3475 domain-containing protein** (domain architecture ID 10571731)  
 DUF668 and DUF3475 domain-containing protein

**Graphical summary**  Zoom to residue level [show extra options >](#)

Query seq.  
 Specific hits  
 Superfamilies

[Search for similar domain architectures](#) [Refine search](#)

**List of domain hits**

| Name        | Accession | Description                                                                                     | Interval | E-value  |
|-------------|-----------|-------------------------------------------------------------------------------------------------|----------|----------|
| [+] DUF668  | pfam05003 | Protein of unknown function (DUF668); Uncharacterized plant protein.                            | 433-522  | 1.74e-48 |
| [+] DUF3475 | pfam11961 | Domain of unknown function (DUF3475); This presumed domain is functionally uncharacterized. ... | 28-84    | 1.60e-25 |

Gb\_DUF668-02

**Protein Classification**  
**DUF668 and DUF3475 domain-containing protein** (domain architecture ID 10571731)  
 DUF668 and DUF3475 domain-containing protein

**Graphical summary**  Zoom to residue level [show extra options >](#)

Query seq.  
 Specific hits  
 Superfamilies

[Search for similar domain architectures](#) [Refine search](#)

**List of domain hits**

| Name        | Accession | Description                                                                                     | Interval | E-value  |
|-------------|-----------|-------------------------------------------------------------------------------------------------|----------|----------|
| [+] DUF668  | pfam05003 | Protein of unknown function (DUF668); Uncharacterized plant protein.                            | 401-490  | 1.43e-44 |
| [+] DUF3475 | pfam11961 | Domain of unknown function (DUF3475); This presumed domain is functionally uncharacterized. ... | 32-87    | 8.57e-25 |

**DUF668 and DUF3475 domain-containing protein** (domain architecture ID 10571731)  
 DUF668 and DUF3475 domain-containing protein

**Graphical summary**  Zoom to residue level [show extra options >](#)

Query seq.  
 Specific hits  
 Superfamilies

[Search for similar domain architectures](#) [Refine search](#)

**List of domain hits**

| Name        | Accession | Description                                                                                     | Interval | E-value  |
|-------------|-----------|-------------------------------------------------------------------------------------------------|----------|----------|
| [+] DUF668  | pfam05003 | Protein of unknown function (DUF668); Uncharacterized plant protein.                            | 313-402  | 2.61e-27 |
| [+] DUF3475 | pfam11961 | Domain of unknown function (DUF3475); This presumed domain is functionally uncharacterized. ... | 44-100   | 3.03e-20 |

Gb\_DUF668-04

**Protein Classification**  
**DUF668 and DUF3475 domain-containing protein** (domain architecture ID 10571731)  
 DUF668 and DUF3475 domain-containing protein

**Graphical summary**  Zoom to residue level [show extra options >](#)

Query seq.  
 Specific hits  
 Superfamilies

[Search for similar domain architectures](#) [Refine search](#)

**List of domain hits**

| Name        | Accession | Description                                                                                     | Interval | E-value  |
|-------------|-----------|-------------------------------------------------------------------------------------------------|----------|----------|
| [+] DUF668  | pfam05003 | Protein of unknown function (DUF668); Uncharacterized plant protein.                            | 426-513  | 1.69e-49 |
| [+] DUF3475 | pfam11961 | Domain of unknown function (DUF3475); This presumed domain is functionally uncharacterized. ... | 47-103   | 1.02e-23 |

**DUF668 and DUF3475 domain-containing protein** (domain architecture ID 10571731)  
DUF668 and DUF3475 domain-containing protein

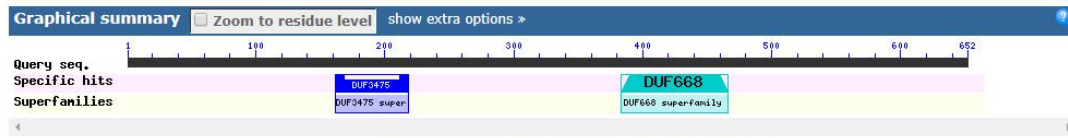

**List of domain hits**

| Name        | Accession | Description                                                                                     | Interval | E-value  |
|-------------|-----------|-------------------------------------------------------------------------------------------------|----------|----------|
| [+] DUF668  | pfam05003 | Protein of unknown function (DUF668); Uncharacterized plant protein.                            | 383-466  | 3.72e-46 |
| [+] DUF3475 | pfam11961 | Domain of unknown function (DUF3475); This presumed domain is functionally uncharacterized. ... | 162-218  | 2.10e-25 |

Gb\_DUF668-06

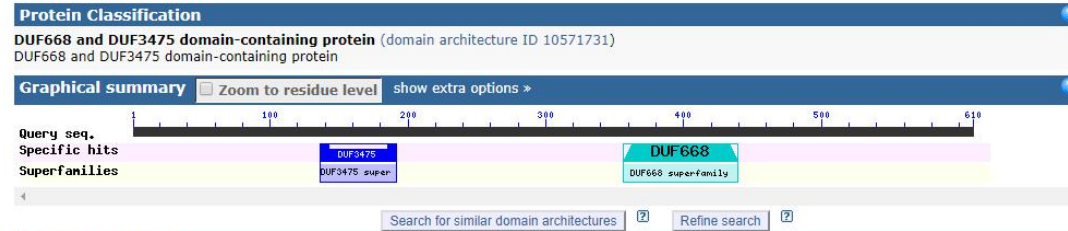

**List of domain hits**

| Name        | Accession | Description                                                                                     | Interval | E-value  |
|-------------|-----------|-------------------------------------------------------------------------------------------------|----------|----------|
| [+] DUF668  | pfam05003 | Protein of unknown function (DUF668); Uncharacterized plant protein.                            | 356-439  | 2.07e-40 |
| [+] DUF3475 | pfam11961 | Domain of unknown function (DUF3475); This presumed domain is functionally uncharacterized. ... | 136-192  | 1.65e-20 |

Gb\_DUF668-07

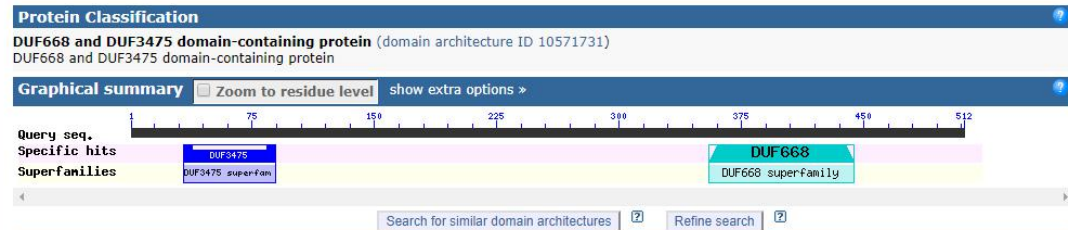

**List of domain hits**

| Name        | Accession | Description                                                                                     | Interval | E-value  |
|-------------|-----------|-------------------------------------------------------------------------------------------------|----------|----------|
| [+] DUF668  | pfam05003 | Protein of unknown function (DUF668); Uncharacterized plant protein.                            | 355-444  | 5.86e-29 |
| [+] DUF3475 | pfam11961 | Domain of unknown function (DUF3475); This presumed domain is functionally uncharacterized. ... | 33-89    | 6.41e-19 |

Gb\_DUF668-08

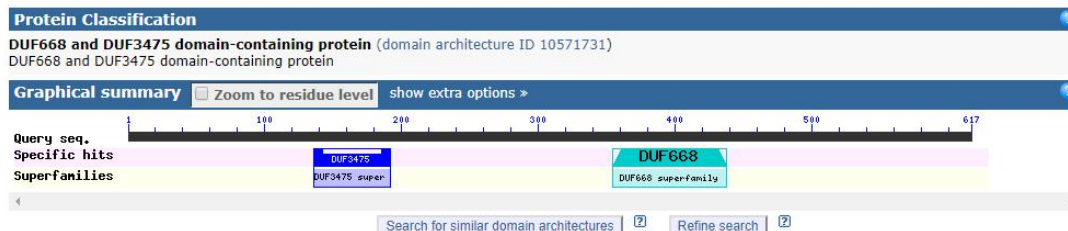

**List of domain hits**

| Name        | Accession | Description                                                                                     | Interval | E-value  |
|-------------|-----------|-------------------------------------------------------------------------------------------------|----------|----------|
| [+] DUF668  | pfam05003 | Protein of unknown function (DUF668); Uncharacterized plant protein.                            | 355-438  | 1.12e-39 |
| [+] DUF3475 | pfam11961 | Domain of unknown function (DUF3475); This presumed domain is functionally uncharacterized. ... | 136-192  | 4.03e-23 |

Gb\_DUF668-09

**Protein Classification** [?](#)

**DUF668 and DUF3475 domain-containing protein** (domain architecture ID 10571731)  
DUF668 and DUF3475 domain-containing protein

**Graphical summary**  Zoom to residue level [show extra options >](#) [?](#)

Query seq.   
Specific hits   
Superfamilies

[Search for similar domain architectures](#) [?](#) [Refine search](#) [?](#)

**List of domain hits** [?](#)

| Name        | Accession | Description                                                                                     | Interval | E-value  |
|-------------|-----------|-------------------------------------------------------------------------------------------------|----------|----------|
| [+] DUF668  | pfam05003 | Protein of unknown function (DUF668); Uncharacterized plant protein.                            | 381-464  | 3.78e-47 |
| [+] DUF3475 | pfam11961 | Domain of unknown function (DUF3475); This presumed domain is functionally uncharacterized. ... | 160-216  | 2.21e-25 |

Gb\_DUF668-10

**Protein Classification** [?](#)

**DUF668 and DUF3475 domain-containing protein** (domain architecture ID 10571731)  
DUF668 and DUF3475 domain-containing protein

**Graphical summary**  Zoom to residue level [show extra options >](#) [?](#)

Query seq.   
Specific hits   
Superfamilies

[Search for similar domain architectures](#) [?](#) [Refine search](#) [?](#)

**List of domain hits** [?](#)

| Name        | Accession | Description                                                                                     | Interval | E-value  |
|-------------|-----------|-------------------------------------------------------------------------------------------------|----------|----------|
| [+] DUF668  | pfam05003 | Protein of unknown function (DUF668); Uncharacterized plant protein.                            | 422-511  | 6.46e-48 |
| [+] DUF3475 | pfam11961 | Domain of unknown function (DUF3475); This presumed domain is functionally uncharacterized. ... | 28-84    | 6.71e-23 |

Gb\_DUF668-11

**Protein Classification** [?](#)

**DUF668 and DUF3475 domain-containing protein** (domain architecture ID 10571731)  
DUF668 and DUF3475 domain-containing protein

**Graphical summary**  Zoom to residue level [show extra options >](#) [?](#)

Query seq.   
Specific hits   
Superfamilies

[Search for similar domain architectures](#) [?](#) [Refine search](#) [?](#)

**List of domain hits** [?](#)

| Name        | Accession | Description                                                                                     | Interval | E-value  |
|-------------|-----------|-------------------------------------------------------------------------------------------------|----------|----------|
| [+] DUF668  | pfam05003 | Protein of unknown function (DUF668); Uncharacterized plant protein.                            | 359-442  | 9.28e-47 |
| [+] DUF3475 | pfam11961 | Domain of unknown function (DUF3475); This presumed domain is functionally uncharacterized. ... | 138-194  | 9.48e-21 |

Gb\_DUF668-12

**Protein Classification** [?](#)

**DUF668 and DUF3475 domain-containing protein** (domain architecture ID 10571731)  
DUF668 and DUF3475 domain-containing protein

**Graphical summary**  Zoom to residue level [show extra options >](#) [?](#)

Query seq.   
Specific hits   
Superfamilies

[Search for similar domain architectures](#) [?](#) [Refine search](#) [?](#)

**List of domain hits** [?](#)

| Name        | Accession | Description                                                                                     | Interval | E-value  |
|-------------|-----------|-------------------------------------------------------------------------------------------------|----------|----------|
| [+] DUF668  | pfam05003 | Protein of unknown function (DUF668); Uncharacterized plant protein.                            | 348-434  | 5.04e-42 |
| [+] DUF3475 | pfam11961 | Domain of unknown function (DUF3475); This presumed domain is functionally uncharacterized. ... | 85-141   | 8.64e-23 |

Gb\_DUF668-13

**Protein Classification** ⓘ

**DUF668 and DUF3475 domain-containing protein** (domain architecture ID 10571731)  
 DUF668 and DUF3475 domain-containing protein

**Graphical summary**  Zoom to residue level [show extra options >](#) ⓘ

Query seq.   
 Specific hits   
 Superfamilies

[Search for similar domain architectures](#) ⓘ [Refine search](#) ⓘ

**List of domain hits** ⓘ

| Name        | Accession | Description                                                                                     | Interval | E-value  |
|-------------|-----------|-------------------------------------------------------------------------------------------------|----------|----------|
| [+] DUF668  | pfam05003 | Protein of unknown function (DUF668); Uncharacterized protein.                                  | 390-479  | 1.18e-40 |
| [+] DUF3475 | pfam11961 | Domain of unknown function (DUF3475); This presumed domain is functionally uncharacterized. ... | 34-90    | 9.81e-22 |

Gb\_DUF668-14

**Protein Classification** ⓘ

**DUF668 and DUF3475 domain-containing protein** (domain architecture ID 10571731)  
 DUF668 and DUF3475 domain-containing protein

**Graphical summary**  Zoom to residue level [show extra options >](#) ⓘ

Query seq.   
 Specific hits   
 Superfamilies

[Search for similar domain architectures](#) ⓘ [Refine search](#) ⓘ

**List of domain hits** ⓘ

| Name        | Accession | Description                                                                                     | Interval | E-value  |
|-------------|-----------|-------------------------------------------------------------------------------------------------|----------|----------|
| [+] DUF668  | pfam05003 | Protein of unknown function (DUF668); Uncharacterized plant protein.                            | 424-511  | 4.30e-48 |
| [+] DUF3475 | pfam11961 | Domain of unknown function (DUF3475); This presumed domain is functionally uncharacterized. ... | 48-104   | 8.04e-24 |

Gb\_DUF668-15

**Protein Classification** ⓘ

**DUF668 and DUF3475 domain-containing protein** (domain architecture ID 10571731)  
 DUF668 and DUF3475 domain-containing protein

**Graphical summary**  Zoom to residue level [show extra options >](#) ⓘ

Query seq.   
 Specific hits   
 Superfamilies

[Search for similar domain architectures](#) ⓘ [Refine search](#) ⓘ

**List of domain hits** ⓘ

| Name        | Accession | Description                                                                                     | Interval | E-value  |
|-------------|-----------|-------------------------------------------------------------------------------------------------|----------|----------|
| [+] DUF668  | pfam05003 | Protein of unknown function (DUF668); Uncharacterized plant protein.                            | 307-392  | 1.52e-44 |
| [+] DUF3475 | pfam11961 | Domain of unknown function (DUF3475); This presumed domain is functionally uncharacterized. ... | 38-94    | 5.17e-26 |

Gb\_DUF668-16

**Protein Classification** ⓘ

**DUF668 and DUF3475 domain-containing protein** (domain architecture ID 10571731)  
 DUF668 and DUF3475 domain-containing protein

**Graphical summary**  Zoom to residue level [show extra options >](#) ⓘ

Query seq.   
 Specific hits   
 Superfamilies

[Search for similar domain architectures](#) ⓘ [Refine search](#) ⓘ

**List of domain hits** ⓘ

| Name        | Accession | Description                                                                                     | Interval | E-value  |
|-------------|-----------|-------------------------------------------------------------------------------------------------|----------|----------|
| [+] DUF668  | pfam05003 | Protein of unknown function (DUF668); Uncharacterized plant protein.                            | 238-324  | 2.15e-41 |
| [+] DUF3475 | pfam11961 | Domain of unknown function (DUF3475); This presumed domain is functionally uncharacterized. ... | 26-82    | 3.13e-20 |

Gb\_DUF668-17

**Protein Classification** [?](#)

**DUF668 and DUF3475 domain-containing protein** (domain architecture ID 10571731)  
DUF668 and DUF3475 domain-containing protein

**Graphical summary**  Zoom to residue level [show extra options >](#)

Query seq.  
Specific hits  
Superfamilies

[Search for similar domain architectures](#) [Refine search](#)

**List of domain hits**

| Name        | Accession | Description                                                                                     | Interval | E-value  |
|-------------|-----------|-------------------------------------------------------------------------------------------------|----------|----------|
| [+] DUF668  | pfam05003 | Protein of unknown function (DUF668); Uncharacterized plant protein.                            | 335-425  | 1.88e-28 |
| [+] DUF3475 | pfam11961 | Domain of unknown function (DUF3475); This presumed domain is functionally uncharacterized. ... | 46-102   | 1.97e-19 |

Gb\_DUF668-18

**Protein Classification** [?](#)

**DUF668 and DUF3475 domain-containing protein** (domain architecture ID 10571731)  
DUF668 and DUF3475 domain-containing protein

**Graphical summary**  Zoom to residue level [show extra options >](#)

Query seq.  
Specific hits  
Superfamilies

[Search for similar domain architectures](#) [Refine search](#)

**List of domain hits**

| Name        | Accession | Description                                                                                     | Interval | E-value  |
|-------------|-----------|-------------------------------------------------------------------------------------------------|----------|----------|
| [+] DUF668  | pfam05003 | Protein of unknown function (DUF668); Uncharacterized plant protein.                            | 433-522  | 2.50e-48 |
| [+] DUF3475 | pfam11961 | Domain of unknown function (DUF3475); This presumed domain is functionally uncharacterized. ... | 28-84    | 1.39e-25 |

Gb\_DUF668-19

**Protein Classification** [?](#)

**DUF668 and DUF3475 domain-containing protein** (domain architecture ID 10571731)  
DUF668 and DUF3475 domain-containing protein

**Graphical summary**  Zoom to residue level [show extra options >](#)

Query seq.  
Specific hits  
Superfamilies

[Search for similar domain architectures](#) [Refine search](#)

**List of domain hits**

| Name        | Accession | Description                                                                                     | Interval | E-value  |
|-------------|-----------|-------------------------------------------------------------------------------------------------|----------|----------|
| [+] DUF668  | pfam05003 | Protein of unknown function (DUF668); Uncharacterized plant protein.                            | 401-490  | 1.43e-44 |
| [+] DUF3475 | pfam11961 | Domain of unknown function (DUF3475); This presumed domain is functionally uncharacterized. ... | 32-87    | 2.33e-24 |

Gb\_DUF668-20

**Protein Classification** [?](#)

**DUF668 and DUF3475 domain-containing protein** (domain architecture ID 10571731)  
DUF668 and DUF3475 domain-containing protein

**Graphical summary**  Zoom to residue level [show extra options >](#)

Query seq.  
Specific hits  
Superfamilies

[Search for similar domain architectures](#) [Refine search](#)

**List of domain hits**

| Name        | Accession | Description                                                                                     | Interval | E-value  |
|-------------|-----------|-------------------------------------------------------------------------------------------------|----------|----------|
| [+] DUF668  | pfam05003 | Protein of unknown function (DUF668); Uncharacterized plant protein.                            | 314-404  | 3.37e-30 |
| [+] DUF3475 | pfam11961 | Domain of unknown function (DUF3475); This presumed domain is functionally uncharacterized. ... | 45-101   | 1.11e-20 |

Gb\_DUF668-21

**Protein Classification**  
DUF668 and DUF3475 domain-containing protein (domain architecture ID 10571731)  
DUF668 and DUF3475 domain-containing protein

**Graphical summary**  Zoom to residue level [show extra options >](#)

Query seq. Specific hits Superfamilies

**List of domain hits**

| Name        | Accession | Description                                                                                     | Interval | E-value  |
|-------------|-----------|-------------------------------------------------------------------------------------------------|----------|----------|
| [+] DUF668  | pfam05003 | Protein of unknown function (DUF668); Uncharacterized plant protein.                            | 427-514  | 3.85e-49 |
| [+] DUF3475 | pfam11961 | Domain of unknown function (DUF3475); This presumed domain is functionally uncharacterized. ... | 47-103   | 1.00e-23 |

Gb\_DUF668-22

**Protein Classification**  
DUF668 and DUF3475 domain-containing protein (domain architecture ID 10571731)  
DUF668 and DUF3475 domain-containing protein

**Graphical summary**  Zoom to residue level [show extra options >](#)

Query seq. Specific hits Superfamilies

**List of domain hits**

| Name        | Accession | Description                                                                                     | Interval | E-value  |
|-------------|-----------|-------------------------------------------------------------------------------------------------|----------|----------|
| [+] DUF668  | pfam05003 | Protein of unknown function (DUF668); Uncharacterized plant protein.                            | 383-466  | 3.72e-46 |
| [+] DUF3475 | pfam11961 | Domain of unknown function (DUF3475); This presumed domain is functionally uncharacterized. ... | 162-218  | 2.94e-24 |

Gb\_DUF668-23

**Protein Classification**  
DUF668 and DUF3475 domain-containing protein (domain architecture ID 10571731)  
DUF668 and DUF3475 domain-containing protein

**Graphical summary**  Zoom to residue level [show extra options >](#)

Query seq. Specific hits Superfamilies

**List of domain hits**

| Name        | Accession | Description                                                                                     | Interval | E-value  |
|-------------|-----------|-------------------------------------------------------------------------------------------------|----------|----------|
| [+] DUF668  | pfam05003 | Protein of unknown function (DUF668); Uncharacterized plant protein.                            | 357-440  | 2.30e-39 |
| [+] DUF3475 | pfam11961 | Domain of unknown function (DUF3475); This presumed domain is functionally uncharacterized. ... | 137-193  | 2.64e-22 |

Gb\_DUF668-24

**Protein Classification**  
DUF668 domain-containing protein (domain architecture ID 10523325)  
DUF668 domain-containing protein

**Graphical summary**  Zoom to residue level [show extra options >](#)

Query seq. Specific hits Superfamilies

**List of domain hits**

| Name       | Accession | Description                                                          | Interval | E-value  |
|------------|-----------|----------------------------------------------------------------------|----------|----------|
| [+] DUF668 | pfam05003 | Protein of unknown function (DUF668); Uncharacterized plant protein. | 46-135   | 4.05e-48 |

Gb\_DUF668-25

**Protein Classification**  
DUF668 and DUF3475 domain-containing protein (domain architecture ID 10571731)  
DUF668 and DUF3475 domain-containing protein

**Graphical summary**  Zoom to residue level [show extra options >](#)

Query seq.  
Specific hits  
Superfamilies

[Search for similar domain architectures](#) [Refine search](#)

**List of domain hits**

| Name        | Accession | Description                                                                                     | Interval | E-value  |
|-------------|-----------|-------------------------------------------------------------------------------------------------|----------|----------|
| [+] DUF668  | pfam05003 | Protein of unknown function (DUF668); Uncharacterized plant protein.                            | 359-448  | 6.37e-31 |
| [+] DUF3475 | pfam11961 | Domain of unknown function (DUF3475); This presumed domain is functionally uncharacterized. ... | 33-89    | 7.80e-19 |

Gb\_DUF668-26

**Protein Classification**  
DUF668 and DUF3475 domain-containing protein (domain architecture ID 10571731)  
DUF668 and DUF3475 domain-containing protein

**Graphical summary**  Zoom to residue level [show extra options >](#)

Query seq.  
Specific hits  
Superfamilies

[Search for similar domain architectures](#) [Refine search](#)

**List of domain hits**

| Name        | Accession | Description                                                                                     | Interval | E-value  |
|-------------|-----------|-------------------------------------------------------------------------------------------------|----------|----------|
| [+] DUF668  | pfam05003 | Protein of unknown function (DUF668); Uncharacterized plant protein.                            | 355-438  | 1.21e-39 |
| [+] DUF3475 | pfam11961 | Domain of unknown function (DUF3475); This presumed domain is functionally uncharacterized. ... | 137-192  | 4.31e-22 |

Gb\_DUF668-27

**Protein Classification**  
DUF668 and DUF3475 domain-containing protein (domain architecture ID 10571731)  
DUF668 and DUF3475 domain-containing protein

**Graphical summary**  Zoom to residue level [show extra options >](#)

Query seq.  
Specific hits  
Superfamilies

[Search for similar domain architectures](#) [Refine search](#)

**List of domain hits**

| Name        | Accession | Description                                                                                     | Interval | E-value  |
|-------------|-----------|-------------------------------------------------------------------------------------------------|----------|----------|
| [+] DUF668  | pfam05003 | Protein of unknown function (DUF668); Uncharacterized plant protein.                            | 381-464  | 3.16e-45 |
| [+] DUF3475 | pfam11961 | Domain of unknown function (DUF3475); This presumed domain is functionally uncharacterized. ... | 160-216  | 5.47e-26 |

Gb\_DUF668-28

**Protein Classification**  
DUF668 and DUF3475 domain-containing protein (domain architecture ID 10571731)  
DUF668 and DUF3475 domain-containing protein

**Graphical summary**  Zoom to residue level [show extra options >](#)

Query seq.  
Specific hits  
Superfamilies

[Search for similar domain architectures](#) [Refine search](#)

**List of domain hits**

| Name        | Accession | Description                                                                                     | Interval | E-value  |
|-------------|-----------|-------------------------------------------------------------------------------------------------|----------|----------|
| [+] DUF668  | pfam05003 | Protein of unknown function (DUF668); Uncharacterized plant protein.                            | 359-442  | 4.94e-45 |
| [+] DUF3475 | pfam11961 | Domain of unknown function (DUF3475); This presumed domain is functionally uncharacterized. ... | 138-194  | 1.13e-22 |

Gb\_DUF668-29

**Protein Classification** ⓘ

**DUF668 and DUF3475 domain-containing protein** (domain architecture ID 10571731)  
DUF668 and DUF3475 domain-containing protein

**Graphical summary**  Zoom to residue level [show extra options](#) ⓘ

Query seq.   
Specific hits   
Superfamilies

[Search for similar domain architectures](#) ⓘ [Refine search](#) ⓘ

**List of domain hits** ⓘ

| +   | Name    | Accession | Description                                                                                     | Interval | E-value  |
|-----|---------|-----------|-------------------------------------------------------------------------------------------------|----------|----------|
| [+] | DUF668  | pfam05003 | Protein of unknown function (DUF668); Uncharacterized plant protein.                            | 390-479  | 1.60e-37 |
| [+] | DUF3475 | pfam11961 | Domain of unknown function (DUF3475); This presumed domain is functionally uncharacterized. ... | 34-89    | 1.10e-20 |

Gb\_DUF668-30

**Protein Classification** ⓘ

**DUF668 and DUF3475 domain-containing protein** (domain architecture ID 10571731)  
DUF668 and DUF3475 domain-containing protein

**Graphical summary**  Zoom to residue level [show extra options](#) ⓘ

Query seq.   
Specific hits   
Superfamilies

[Search for similar domain architectures](#) ⓘ [Refine search](#) ⓘ

**List of domain hits** ⓘ

| +   | Name    | Accession | Description                                                                                     | Interval | E-value  |
|-----|---------|-----------|-------------------------------------------------------------------------------------------------|----------|----------|
| [+] | DUF668  | pfam05003 | Protein of unknown function (DUF668); Uncharacterized plant protein.                            | 430-517  | 9.78e-49 |
| [+] | DUF3475 | pfam11961 | Domain of unknown function (DUF3475); This presumed domain is functionally uncharacterized. ... | 48-104   | 1.65e-23 |

Gb\_DUF668-31

**Protein Classification** ⓘ

**DUF668 and DUF3475 domain-containing protein** (domain architecture ID 10571731)  
DUF668 and DUF3475 domain-containing protein

**Graphical summary**  Zoom to residue level [show extra options](#) ⓘ

Query seq.   
Specific hits   
Superfamilies

[Search for similar domain architectures](#) ⓘ [Refine search](#) ⓘ

**List of domain hits** ⓘ

| +   | Name    | Accession | Description                                                                                     | Interval | E-value  |
|-----|---------|-----------|-------------------------------------------------------------------------------------------------|----------|----------|
| [+] | DUF668  | pfam05003 | Protein of unknown function (DUF668); Uncharacterized plant protein.                            | 307-392  | 1.50e-44 |
| [+] | DUF3475 | pfam11961 | Domain of unknown function (DUF3475); This presumed domain is functionally uncharacterized. ... | 38-94    | 2.74e-26 |

Gb\_DUF668-32

**Protein Classification** ⓘ

**DUF668 and DUF3475 domain-containing protein** (domain architecture ID 10571731)  
DUF668 and DUF3475 domain-containing protein

**Graphical summary**  Zoom to residue level [show extra options](#) ⓘ

Query seq.   
Specific hits   
Superfamilies

[Search for similar domain architectures](#) ⓘ [Refine search](#) ⓘ

**List of domain hits** ⓘ

| +   | Name    | Accession | Description                                                                                     | Interval | E-value  |
|-----|---------|-----------|-------------------------------------------------------------------------------------------------|----------|----------|
| [+] | DUF668  | pfam05003 | Protein of unknown function (DUF668); Uncharacterized plant protein.                            | 238-324  | 1.09e-41 |
| [+] | DUF3475 | pfam11961 | Domain of unknown function (DUF3475); This presumed domain is functionally uncharacterized. ... | 26-82    | 1.83e-18 |



Gb\_DUF668-33

**Protein Classification**  
**DUF668 domain-containing protein** (domain architecture ID 10523325)  
 DUF668 domain-containing protein

**Graphical summary**  Zoom to residue level [show extra options >](#)

Query seq.  
 Specific hits  
 Superfamilies

[Search for similar domain architectures](#) [Refine search](#)

**List of domain hits**

| Name       | Accession | Description                                                          | Interval | E-value  |
|------------|-----------|----------------------------------------------------------------------|----------|----------|
| [+] DUF668 | pfam05003 | Protein of unknown function (DUF668); Uncharacterized plant protein. | 28-118   | 7.59e-33 |

References:

## *G. arboreum*

Ga\_DUF668-01

**Protein Classification**  
**DUF668 and DUF3475 domain-containing protein** (domain architecture ID 10571731)  
 DUF668 and DUF3475 domain-containing protein

**Graphical summary**  Zoom to residue level [show extra options >](#)

Query seq.  
 Specific hits  
 Superfamilies

[Search for similar domain architectures](#) [Refine search](#)

**List of domain hits**

| Name        | Accession | Description                                                                                     | Interval | E-value  |
|-------------|-----------|-------------------------------------------------------------------------------------------------|----------|----------|
| [+] DUF668  | pfam05003 | Protein of unknown function (DUF668); Uncharacterized plant protein.                            | 433-522  | 2.06e-47 |
| [+] DUF3475 | pfam11961 | Domain of unknown function (DUF3475); This presumed domain is functionally uncharacterized. ... | 28-84    | 1.38e-25 |

Ga\_DUF668-02

**Protein Classification**  
**DUF668 and DUF3475 domain-containing protein** (domain architecture ID 10571731)  
 DUF668 and DUF3475 domain-containing protein

**Graphical summary**  Zoom to residue level [show extra options >](#)

Query seq.  
 Specific hits  
 Superfamilies

[Search for similar domain architectures](#) [Refine search](#)

**List of domain hits**

| Name        | Accession | Description                                                                                     | Interval | E-value  |
|-------------|-----------|-------------------------------------------------------------------------------------------------|----------|----------|
| [+] DUF668  | pfam05003 | Protein of unknown function (DUF668); Uncharacterized plant protein.                            | 401-490  | 1.62e-44 |
| [+] DUF3475 | pfam11961 | Domain of unknown function (DUF3475); This presumed domain is functionally uncharacterized. ... | 32-87    | 2.31e-24 |

Ga\_DUF668-03

**Protein Classification**  
**DUF668 and DUF3475 domain-containing protein** (domain architecture ID 10571731)  
 DUF668 and DUF3475 domain-containing protein

**Graphical summary**  Zoom to residue level [show extra options >](#)

Query seq.  
 Specific hits  
 Superfamilies

[Search for similar domain architectures](#) [Refine search](#)

**List of domain hits**

| Name        | Accession | Description                                                                                     | Interval | E-value  |
|-------------|-----------|-------------------------------------------------------------------------------------------------|----------|----------|
| [+] DUF668  | pfam05003 | Protein of unknown function (DUF668); Uncharacterized plant protein.                            | 313-402  | 6.41e-29 |
| [+] DUF3475 | pfam11961 | Domain of unknown function (DUF3475); This presumed domain is functionally uncharacterized. ... | 44-100   | 1.36e-20 |

Ga\_DUF668-04

**Protein Classification**

**DUF668 and DUF3475 domain-containing protein** (domain architecture ID 10571731)  
 DUF668 and DUF3475 domain-containing protein

**Graphical summary**  Zoom to residue level [show extra options >](#)

Query seq. Specific hits Superfamilies

[Search for similar domain architectures](#) [Refine search](#)

**List of domain hits**

| Name        | Accession | Description                                                                                     | Interval | E-value  |
|-------------|-----------|-------------------------------------------------------------------------------------------------|----------|----------|
| [+] DUF668  | pfam05003 | Protein of unknown function (DUF668); Uncharacterized plant protein.                            | 383-466  | 3.72e-46 |
| [+] DUF3475 | pfam11961 | Domain of unknown function (DUF3475); This presumed domain is functionally uncharacterized. ... | 162-218  | 2.12e-25 |

Ga\_DUF668-05

**Protein Classification**

**DUF668 and DUF3475 domain-containing protein** (domain architecture ID 10571731)  
 DUF668 and DUF3475 domain-containing protein

**Graphical summary**  Zoom to residue level [show extra options >](#)

Query seq. Specific hits Superfamilies

[Search for similar domain architectures](#) [Refine search](#)

**List of domain hits**

| Name        | Accession | Description                                                                                     | Interval | E-value  |
|-------------|-----------|-------------------------------------------------------------------------------------------------|----------|----------|
| [+] DUF668  | pfam05003 | Protein of unknown function (DUF668); Uncharacterized plant protein.                            | 426-513  | 9.35e-50 |
| [+] DUF3475 | pfam11961 | Domain of unknown function (DUF3475); This presumed domain is functionally uncharacterized. ... | 47-103   | 1.40e-23 |

Ga\_DUF668-06

**Graphical summary**  Zoom to residue level [show extra options >](#)

Query seq. Specific hits Superfamilies

[Search for similar domain architectures](#) [Refine search](#)

**List of domain hits**

| Name                  | Accession | Description                                                                                     | Interval | E-value  |
|-----------------------|-----------|-------------------------------------------------------------------------------------------------|----------|----------|
| [+] DUF668            | pfam05003 | Protein of unknown function (DUF668); Uncharacterized plant protein.                            | 356-439  | 1.80e-40 |
| [+] DUF3475           | pfam11961 | Domain of unknown function (DUF3475); This presumed domain is functionally uncharacterized. ... | 136-192  | 8.50e-22 |
| [+] EzrA super family | cl38199   | Septation ring formation regulator, EzrA; During the bacterial cell cycle, the tubulin-like ... | 233-356  | 8.99e-04 |

Ga\_DUF668-07

**Protein Classification**

**DUF668 and DUF3475 domain-containing protein** (domain architecture ID 10571731)  
 DUF668 and DUF3475 domain-containing protein

**Graphical summary**  Zoom to residue level [show extra options >](#)

Query seq. Specific hits Superfamilies

[Search for similar domain architectures](#) [Refine search](#)

**List of domain hits**

| Name        | Accession | Description                                                                                     | Interval | E-value  |
|-------------|-----------|-------------------------------------------------------------------------------------------------|----------|----------|
| [+] DUF668  | pfam05003 | Protein of unknown function (DUF668); Uncharacterized plant protein.                            | 355-444  | 5.86e-29 |
| [+] DUF3475 | pfam11961 | Domain of unknown function (DUF3475); This presumed domain is functionally uncharacterized. ... | 33-89    | 5.54e-19 |

Ga\_DUF668-08

**Protein Classification**

**DUF668 and DUF3475 domain-containing protein** (domain architecture ID 10571731)  
 DUF668 and DUF3475 domain-containing protein

**Graphical summary**  Zoom to residue level [show extra options >](#)

Query seq. Specific hits Superfamilies

[Search for similar domain architectures](#) [Refine search](#)

**List of domain hits**

| Name        | Accession | Description                                                                                     | Interval | E-value  |
|-------------|-----------|-------------------------------------------------------------------------------------------------|----------|----------|
| [+] DUF668  | pfam05003 | Protein of unknown function (DUF668); Uncharacterized plant protein.                            | 422-511  | 5.41e-48 |
| [+] DUF3475 | pfam11961 | Domain of unknown function (DUF3475); This presumed domain is functionally uncharacterized. ... | 28-84    | 6.03e-23 |

Ga\_DUF668-09

**Protein Classification** ?

**DUF668 and DUF3475 domain-containing protein** (domain architecture ID 10571731)  
DUF668 and DUF3475 domain-containing protein

**Graphical summary**  Zoom to residue level [show extra options >](#) ?

Query seq. Specific hits Superfamilies

Search for similar domain architectures ? Refine search ?

**List of domain hits** ?

| Name        | Accession | Description                                                                                     | Interval | E-value  |
|-------------|-----------|-------------------------------------------------------------------------------------------------|----------|----------|
| [+] DUF668  | pfam05003 | Protein of unknown function (DUF668); Uncharacterized plant protein.                            | 381-464  | 3.78e-47 |
| [+] DUF3475 | pfam11961 | Domain of unknown function (DUF3475); This presumed domain is functionally uncharacterized. ... | 160-216  | 5.80e-26 |

Ga\_DUF668-10

**Graphical summary**  Zoom to residue level [show extra options >](#) ?

Query seq. Specific hits Superfamilies

Search for similar domain architectures ? Refine search ?

**List of domain hits** ?

| Name                  | Accession | Description                                                                                     | Interval | E-value  |
|-----------------------|-----------|-------------------------------------------------------------------------------------------------|----------|----------|
| [+] DUF668            | pfam05003 | Protein of unknown function (DUF668); Uncharacterized plant protein.                            | 355-438  | 1.16e-39 |
| [+] DUF3475           | pfam11961 | Domain of unknown function (DUF3475); This presumed domain is functionally uncharacterized. ... | 136-192  | 5.55e-23 |
| [+] DnaX super family | cl39080   | DNA polymerase III, gamma/tau subunits [Replication, recombination and repair];                 | 152-297  | 6.30e-03 |

Ga\_DUF668-11

**Protein Classification** ?

**DUF668 and DUF3475 domain-containing protein** (domain architecture ID 10571731)  
DUF668 and DUF3475 domain-containing protein

**Graphical summary**  Zoom to residue level [show extra options >](#) ?

Query seq. Specific hits Superfamilies

Search for similar domain architectures ? Refine search ?

**List of domain hits** ?

| Name        | Accession | Description                                                                                     | Interval | E-value  |
|-------------|-----------|-------------------------------------------------------------------------------------------------|----------|----------|
| [+] DUF668  | pfam05003 | Protein of unknown function (DUF668); Uncharacterized plant protein.                            | 359-442  | 9.28e-47 |
| [+] DUF3475 | pfam11961 | Domain of unknown function (DUF3475); This presumed domain is functionally uncharacterized. ... | 138-194  | 9.42e-22 |

Ga\_DUF668-12

**Protein Classification** ?

**DUF668 and DUF3475 domain-containing protein** (domain architecture ID 10571731)  
DUF668 and DUF3475 domain-containing protein

**Graphical summary**  Zoom to residue level [show extra options >](#) ?

Query seq. Specific hits Superfamilies

Search for similar domain architectures ? Refine search ?

**List of domain hits** ?

| Name        | Accession | Description                                                                                     | Interval | E-value  |
|-------------|-----------|-------------------------------------------------------------------------------------------------|----------|----------|
| [+] DUF668  | pfam05003 | Protein of unknown function (DUF668); Uncharacterized plant protein.                            | 390-479  | 1.38e-40 |
| [+] DUF3475 | pfam11961 | Domain of unknown function (DUF3475); This presumed domain is functionally uncharacterized. ... | 34-90    | 1.30e-21 |

Ga\_DUF668-13

**Protein Classification** ?

**DUF668 and DUF3475 domain-containing protein** (domain architecture ID 10571731)  
 DUF668 and DUF3475 domain-containing protein

**Graphical summary**  Zoom to residue level [show extra options >](#) ?

Query seq. 1 100 200 300 400 500 567

Specific hits DUF3475 DUF668

Superfamilies DUF3475 superfamily DUF668 superfamily

[Search for similar domain architectures](#) ? [Refine search](#) ?

**List of domain hits** ?

| Name        | Accession | Description                                                                                     | Interval | E-value  |
|-------------|-----------|-------------------------------------------------------------------------------------------------|----------|----------|
| [+] DUF668  | pfam05003 | Protein of unknown function (DUF668); Uncharacterized plant protein.                            | 398-485  | 1.92e-49 |
| [+] DUF3475 | pfam11961 | Domain of unknown function (DUF3475); This presumed domain is functionally uncharacterized. ... | 48-104   | 7.46e-24 |

Ga\_DUF668-14

**Protein Classification** ?

**DUF668 and DUF3475 domain-containing protein** (domain architecture ID 10571731)  
 DUF668 and DUF3475 domain-containing protein

**Graphical summary**  Zoom to residue level [show extra options >](#) ?

Query seq. 1 75 150 225 300 375 450

Specific hits DUF3475 DUF668

Superfamilies DUF3475 superfamily DUF668 superfamily

[Search for similar domain architectures](#) ? [Refine search](#) ?

**List of domain hits** ?

| Name        | Accession | Description                                                                                     | Interval | E-value  |
|-------------|-----------|-------------------------------------------------------------------------------------------------|----------|----------|
| [+] DUF668  | pfam05003 | Protein of unknown function (DUF668); Uncharacterized plant protein.                            | 295-381  | 4.10e-42 |
| [+] DUF3475 | pfam11961 | Domain of unknown function (DUF3475); This presumed domain is functionally uncharacterized. ... | 32-88    | 7.68e-23 |

Ga\_DUF668-15

**Protein Classification** ?

**DUF668 and DUF3475 domain-containing protein** (domain architecture ID 10571731)  
 DUF668 and DUF3475 domain-containing protein

**Graphical summary**  Zoom to residue level [show extra options >](#) ?

Query seq. 1 75 150 225 300 375 451

Specific hits DUF3475 DUF668

Superfamilies DUF3475 superfamily DUF668 superfamily

[Search for similar domain architectures](#) ? [Refine search](#) ?

**List of domain hits** ?

| Name        | Accession | Description                                                                                     | Interval | E-value  |
|-------------|-----------|-------------------------------------------------------------------------------------------------|----------|----------|
| [+] DUF668  | pfam05003 | Protein of unknown function (DUF668); Uncharacterized plant protein.                            | 307-392  | 4.23e-43 |
| [+] DUF3475 | pfam11961 | Domain of unknown function (DUF3475); This presumed domain is functionally uncharacterized. ... | 38-94    | 1.92e-26 |

Ga\_DUF668-16

**Protein Classification** ?

**DUF668 and DUF3475 domain-containing protein** (domain architecture ID 10571731)  
 DUF668 and DUF3475 domain-containing protein

**Graphical summary**  Zoom to residue level [show extra options >](#) ?

Query seq. 1 50 100 150 200 250 300 350 392

Specific hits DUF3475 DUF668

Superfamilies DUF3475 superfamily DUF668 superfamily

[Search for similar domain architectures](#) ? [Refine search](#) ?

**List of domain hits** ?

| Name        | Accession | Description                                                                                     | Interval | E-value  |
|-------------|-----------|-------------------------------------------------------------------------------------------------|----------|----------|
| [+] DUF668  | pfam05003 | Protein of unknown function (DUF668); Uncharacterized plant protein.                            | 238-324  | 2.06e-42 |
| [+] DUF3475 | pfam11961 | Domain of unknown function (DUF3475); This presumed domain is functionally uncharacterized. ... | 28-82    | 9.13e-21 |

Ga\_DUF668-17

**Protein Classification** ?

**DUF668 and DUF3475 domain-containing protein** (domain architecture ID 10571731)  
 DUF668 and DUF3475 domain-containing protein

**Graphical summary**  Zoom to residue level [show extra options >](#) ?

Query seq.   
 Specific hits   
 Superfamilies

[Search for similar domain architectures](#) ? [Refine search](#) ?

**List of domain hits** ?

| Name        | Accession | Description                                                                                     | Interval | E-value  |
|-------------|-----------|-------------------------------------------------------------------------------------------------|----------|----------|
| [+] DUF668  | pfam05003 | Protein of unknown function (DUF668); Uncharacterized plant protein.                            | 289-379  | 6.95e-30 |
| [+] DUF3475 | pfam11961 | Domain of unknown function (DUF3475); This presumed domain is functionally uncharacterized. ... | 24-80    | 2.18e-19 |

*G. raimondii*

Gr\_DUF668-01

**Graphical summary**  Zoom to residue level [show extra options >](#) ?

Query seq.   
 Superfamilies

[Search for similar domain architectures](#) ? [Refine search](#) ?

**List of domain hits** ?

| Name                    | Accession | Description                                                          | Interval | E-value  |
|-------------------------|-----------|----------------------------------------------------------------------|----------|----------|
| [+] DUF668 super family | cl04883   | Protein of unknown function (DUF668); Uncharacterized plant protein. | 78-98    | 2.12e-09 |

Gr\_DUF668-02

**Protein Classification** ?

**DUF668 and DUF3475 domain-containing protein** (domain architecture ID 10571731)  
 DUF668 and DUF3475 domain-containing protein

**Graphical summary**  Zoom to residue level [show extra options >](#) ?

Query seq.   
 Specific hits   
 Superfamilies

[Search for similar domain architectures](#) ? [Refine search](#) ?

**List of domain hits** ?

| Name        | Accession | Description                                                                                     | Interval | E-value  |
|-------------|-----------|-------------------------------------------------------------------------------------------------|----------|----------|
| [+] DUF668  | pfam05003 | Protein of unknown function (DUF668); Uncharacterized plant protein.                            | 355-438  | 3.97e-41 |
| [+] DUF3475 | pfam11961 | Domain of unknown function (DUF3475); This presumed domain is functionally uncharacterized. ... | 137-192  | 3.76e-22 |

Gr\_DUF668-03

**Protein Classification** ?

**DUF668 and DUF3475 domain-containing protein** (domain architecture ID 10571731)  
 DUF668 and DUF3475 domain-containing protein

**Graphical summary**  Zoom to residue level [show extra options >](#) ?

Query seq.   
 Specific hits   
 Superfamilies

[Search for similar domain architectures](#) ? [Refine search](#) ?

**List of domain hits** ?

| Name        | Accession | Description                                                                                     | Interval | E-value  |
|-------------|-----------|-------------------------------------------------------------------------------------------------|----------|----------|
| [+] DUF668  | pfam05003 | Protein of unknown function (DUF668); Uncharacterized plant protein.                            | 381-464  | 3.82e-47 |
| [+] DUF3475 | pfam11961 | Domain of unknown function (DUF3475); This presumed domain is functionally uncharacterized. ... | 160-216  | 5.37e-26 |

Gr\_DUF668-04

**Protein Classification**

**DUF668 and DUF3475 domain-containing protein** (domain architecture ID 10571731)  
 DUF668 and DUF3475 domain-containing protein

**Graphical summary**  Zoom to residue level [show extra options >](#)

Query seq. 1 75 150 225 300 375 450 462

Specific hits DUF3475 DUF668

Superfamilies DUF3475 superFam11 DUF668 superfamily

[Search for similar domain architectures](#)  [Refine search](#)

**List of domain hits**

| Name        | Accession | Description                                                                                     | Interval | E-value  |
|-------------|-----------|-------------------------------------------------------------------------------------------------|----------|----------|
| [+] DUF668  | pfam05003 | Protein of unknown function (DUF668); Uncharacterized plant protein.                            | 307-392  | 1.67e-44 |
| [+] DUF3475 | pfam11961 | Domain of unknown function (DUF3475); This presumed domain is functionally uncharacterized. ... | 38-94    | 2.93e-26 |

Gr\_DUF668-05

**Protein Classification**

**DUF668 and DUF3475 domain-containing protein** (domain architecture ID 10571731)  
 DUF668 and DUF3475 domain-containing protein

**Graphical summary**  Zoom to residue level [show extra options >](#)

Query seq. 1 100 200 300 400 500 599

Specific hits DUF3475 DUF668

Superfamilies DUF3475 superF DUF668 superfamily

[Search for similar domain architectures](#)  [Refine search](#)

**List of domain hits**

| Name        | Accession | Description                                                                                     | Interval | E-value  |
|-------------|-----------|-------------------------------------------------------------------------------------------------|----------|----------|
| [+] DUF668  | pfam05003 | Protein of unknown function (DUF668); Uncharacterized plant protein.                            | 401-490  | 1.35e-44 |
| [+] DUF3475 | pfam11961 | Domain of unknown function (DUF3475); This presumed domain is functionally uncharacterized. ... | 32-87    | 2.66e-24 |

Gr\_DUF668-06

**Protein Classification**

**DUF668 and DUF3475 domain-containing protein** (domain architecture ID 10571731)  
 DUF668 and DUF3475 domain-containing protein

**Graphical summary**  Zoom to residue level [show extra options >](#)

Query seq. 1 100 200 300 400 500 599

Specific hits DUF3475 DUF668

Superfamilies DUF3475 superF DUF668 superfamily

[Search for similar domain architectures](#)  [Refine search](#)

**List of domain hits**

| Name        | Accession | Description                                                                                     | Interval | E-value  |
|-------------|-----------|-------------------------------------------------------------------------------------------------|----------|----------|
| [+] DUF668  | pfam05003 | Protein of unknown function (DUF668); Uncharacterized plant protein.                            | 433-522  | 1.20e-48 |
| [+] DUF3475 | pfam11961 | Domain of unknown function (DUF3475); This presumed domain is functionally uncharacterized. ... | 28-84    | 1.28e-25 |

Gr\_DUF668-07

**Protein Classification**

**DUF668 and DUF3475 domain-containing protein** (domain architecture ID 10571731)  
 DUF668 and DUF3475 domain-containing protein

**Graphical summary**  Zoom to residue level [show extra options >](#)

Query seq. 1 75 150 225 300 375 450 466

Specific hits DUF3475 DUF668

Superfamilies DUF3475 superFam11 DUF668 superfamily

[Search for similar domain architectures](#)  [Refine search](#)

**List of domain hits**

| Name        | Accession | Description                                                                                     | Interval | E-value  |
|-------------|-----------|-------------------------------------------------------------------------------------------------|----------|----------|
| [+] DUF668  | pfam05003 | Protein of unknown function (DUF668); Uncharacterized plant protein.                            | 315-405  | 3.44e-30 |
| [+] DUF3475 | pfam11961 | Domain of unknown function (DUF3475); This presumed domain is functionally uncharacterized. ... | 46-102   | 1.12e-20 |

Gr\_DUF668-08

**Protein Classification** ?

**DUF668 and DUF3475 domain-containing protein** (domain architecture ID 10571731)  
DUF668 and DUF3475 domain-containing protein

**Graphical summary**  Zoom to residue level [show extra options >](#) ?

Query seq. 1 100 200 300 400 500 597

Specific hits

Superfamilies

[Search for similar domain architectures](#) (2) [Refine search](#) (2)

**List of domain hits** ?

| Name        | Accession | Description                                                                                     | Interval | E-value  |
|-------------|-----------|-------------------------------------------------------------------------------------------------|----------|----------|
| [+] DUF668  | pfam05003 | Protein of unknown function (DUF668); Uncharacterized plant protein.                            | 427-514  | 3.79e-49 |
| [+] DUF3475 | pfam11961 | Domain of unknown function (DUF3475); This presumed domain is functionally uncharacterized. ... | 47-103   | 1.08e-23 |

Gr\_DUF668-09

**Protein Classification** ?

**DUF668 and DUF3475 domain-containing protein** (domain architecture ID 10571731)  
DUF668 and DUF3475 domain-containing protein

**Graphical summary**  Zoom to residue level [show extra options >](#) ?

Query seq. 1 100 200 300 400 500 601

Specific hits

Superfamilies

[Search for similar domain architectures](#) (2) [Refine search](#) (2)

**List of domain hits** ?

| Name        | Accession | Description                                                                                     | Interval | E-value  |
|-------------|-----------|-------------------------------------------------------------------------------------------------|----------|----------|
| [+] DUF668  | pfam05003 | Protein of unknown function (DUF668); Uncharacterized plant protein.                            | 346-429  | 2.34e-39 |
| [+] DUF3475 | pfam11961 | Domain of unknown function (DUF3475); This presumed domain is functionally uncharacterized. ... | 126-182  | 2.33e-22 |

Gr\_DUF668-10

**Protein Classification** ?

**DUF668 and DUF3475 domain-containing protein** (domain architecture ID 10571731)  
DUF668 and DUF3475 domain-containing protein

**Graphical summary**  Zoom to residue level [show extra options >](#) ?

Query seq. 1 100 200 300 400 500 600 653

Specific hits

Superfamilies

[Search for similar domain architectures](#) (2) [Refine search](#) (2)

**List of domain hits** ?

| Name        | Accession | Description                                                                                     | Interval | E-value  |
|-------------|-----------|-------------------------------------------------------------------------------------------------|----------|----------|
| [+] DUF668  | pfam05003 | Protein of unknown function (DUF668); Uncharacterized plant protein.                            | 383-466  | 3.76e-46 |
| [+] DUF3475 | pfam11961 | Domain of unknown function (DUF3475); This presumed domain is functionally uncharacterized. ... | 162-218  | 2.96e-23 |

Gr\_DUF668-11

**Protein Classification** ?

**DUF668 and DUF3475 domain-containing protein** (domain architecture ID 10571731)  
DUF668 and DUF3475 domain-containing protein

**Graphical summary**  Zoom to residue level [show extra options >](#) ?

Query seq. 1 50 100 150 200 250 300 350 393

Specific hits

Superfamilies

[Search for similar domain architectures](#) (2) [Refine search](#) (2)

**List of domain hits** ?

| Name        | Accession | Description                                                                                     | Interval | E-value  |
|-------------|-----------|-------------------------------------------------------------------------------------------------|----------|----------|
| [+] DUF668  | pfam05003 | Protein of unknown function (DUF668); Uncharacterized plant protein.                            | 238-324  | 5.30e-42 |
| [+] DUF3475 | pfam11961 | Domain of unknown function (DUF3475); This presumed domain is functionally uncharacterized. ... | 26-82    | 9.88e-21 |

Gr\_DUF668-12

**Protein Classification**

**DUF668 and DUF3475 domain-containing protein** (domain architecture ID 10571731)  
DUF668 and DUF3475 domain-containing protein

**Graphical summary**  Zoom to residue level [show extra options >](#)

Query seq.  
Specific hits  
Superfamilies

[Search for similar domain architectures](#) [Refine search](#)

**List of domain hits**

| Name        | Accession | Description                                                                                     | Interval | E-value  |
|-------------|-----------|-------------------------------------------------------------------------------------------------|----------|----------|
| [+] DUF668  | pfam05003 | Protein of unknown function (DUF668); Uncharacterized plant protein.                            | 359-442  | 7.74e-45 |
| [+] DUF3475 | pfam11961 | Domain of unknown function (DUF3475); This presumed domain is functionally uncharacterized. ... | 138-194  | 1.66e-22 |

Gr\_DUF668-13

**Protein Classification**

**DUF668 and DUF3475 domain-containing protein** (domain architecture ID 10571731)  
DUF668 and DUF3475 domain-containing protein

**Graphical summary**  Zoom to residue level [show extra options >](#)

Query seq.  
Specific hits  
Superfamilies

[Search for similar domain architectures](#) [Refine search](#)

**List of domain hits**

| Name        | Accession | Description                                                                                     | Interval | E-value  |
|-------------|-----------|-------------------------------------------------------------------------------------------------|----------|----------|
| [+] DUF668  | pfam05003 | Protein of unknown function (DUF668); Uncharacterized plant protein.                            | 289-379  | 6.16e-32 |
| [+] DUF3475 | pfam11961 | Domain of unknown function (DUF3475); This presumed domain is functionally uncharacterized. ... | 24-80    | 4.61e-20 |

Gr\_DUF668-14

**Protein Classification**

**DUF668 and DUF3475 domain-containing protein** (domain architecture ID 10571731)  
DUF668 and DUF3475 domain-containing protein

**Graphical summary**  Zoom to residue level [show extra options >](#)

Query seq.  
Specific hits  
Superfamilies

[Search for similar domain architectures](#) [Refine search](#)

**List of domain hits**

| Name        | Accession | Description                                                                                     | Interval | E-value  |
|-------------|-----------|-------------------------------------------------------------------------------------------------|----------|----------|
| [+] DUF668  | pfam05003 | Protein of unknown function (DUF668); Uncharacterized plant protein.                            | 422-511  | 7.04e-48 |
| [+] DUF3475 | pfam11961 | Domain of unknown function (DUF3475); This presumed domain is functionally uncharacterized. ... | 28-84    | 1.90e-24 |

Gr\_DUF668-15

**Protein Classification**

**DUF668 and DUF3475 domain-containing protein** (domain architecture ID 10571731)  
DUF668 and DUF3475 domain-containing protein

**Graphical summary**  Zoom to residue level [show extra options >](#)

Query seq.  
Specific hits  
Superfamilies

[Search for similar domain architectures](#) [Refine search](#)

**List of domain hits**

| Name        | Accession | Description                                                                                     | Interval | E-value  |
|-------------|-----------|-------------------------------------------------------------------------------------------------|----------|----------|
| [+] DUF668  | pfam05003 | Protein of unknown function (DUF668); Uncharacterized plant protein.                            | 359-448  | 8.57e-30 |
| [+] DUF3475 | pfam11961 | Domain of unknown function (DUF3475); This presumed domain is functionally uncharacterized. ... | 33-89    | 7.23e-19 |



Gr\_DUF668-16

### Protein Classification

**DUF668 and DUF3475 domain-containing protein** (domain architecture ID 10571731)  
DUF668 and DUF3475 domain-containing protein

### Graphical summary

Zoom to residue level [show extra options >](#)

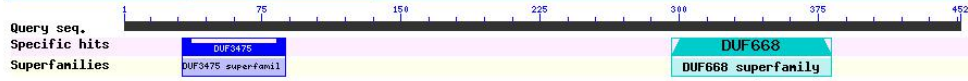

[Search for similar domain architectures](#) [Refine search](#)

### List of domain hits

|     | Name    | Accession | Description                                                                                     | Interval | E-value  |
|-----|---------|-----------|-------------------------------------------------------------------------------------------------|----------|----------|
| [+] | DUF668  | pfam05003 | Protein of unknown function (DUF668); Uncharacterized plant protein.                            | 296-382  | 7.22e-44 |
| [+] | DUF3475 | pfam11961 | Domain of unknown function (DUF3475); This presumed domain is functionally uncharacterized. ... | 32-88    | 2.41e-23 |

Gr\_DUF668-17

### Protein Classification

**DUF668 and DUF3475 domain-containing protein** (domain architecture ID 10571731)  
DUF668 and DUF3475 domain-containing protein

### Graphical summary

Zoom to residue level [show extra options >](#)

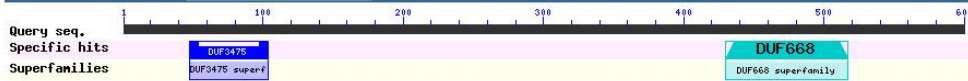

[Search for similar domain architectures](#) [Refine search](#)

### List of domain hits

|     | Name    | Accession | Description                                                                                     | Interval | E-value  |
|-----|---------|-----------|-------------------------------------------------------------------------------------------------|----------|----------|
| [+] | DUF668  | pfam05003 | Protein of unknown function (DUF668); Uncharacterized plant protein.                            | 430-517  | 3.54e-48 |
| [+] | DUF3475 | pfam11961 | Domain of unknown function (DUF3475); This presumed domain is functionally uncharacterized. ... | 48-104   | 1.62e-23 |
