# Supplementary material for: Genome-wide identification of the DUF668 gene family in cotton and expression profiling analysis of GhDUF668 in Gossypium hirsutum under adverse stress
Source: PubMed Central journal article supplement (PMC8162019; doi:10.1186/s12864-021-07716-w), 2021-05-27

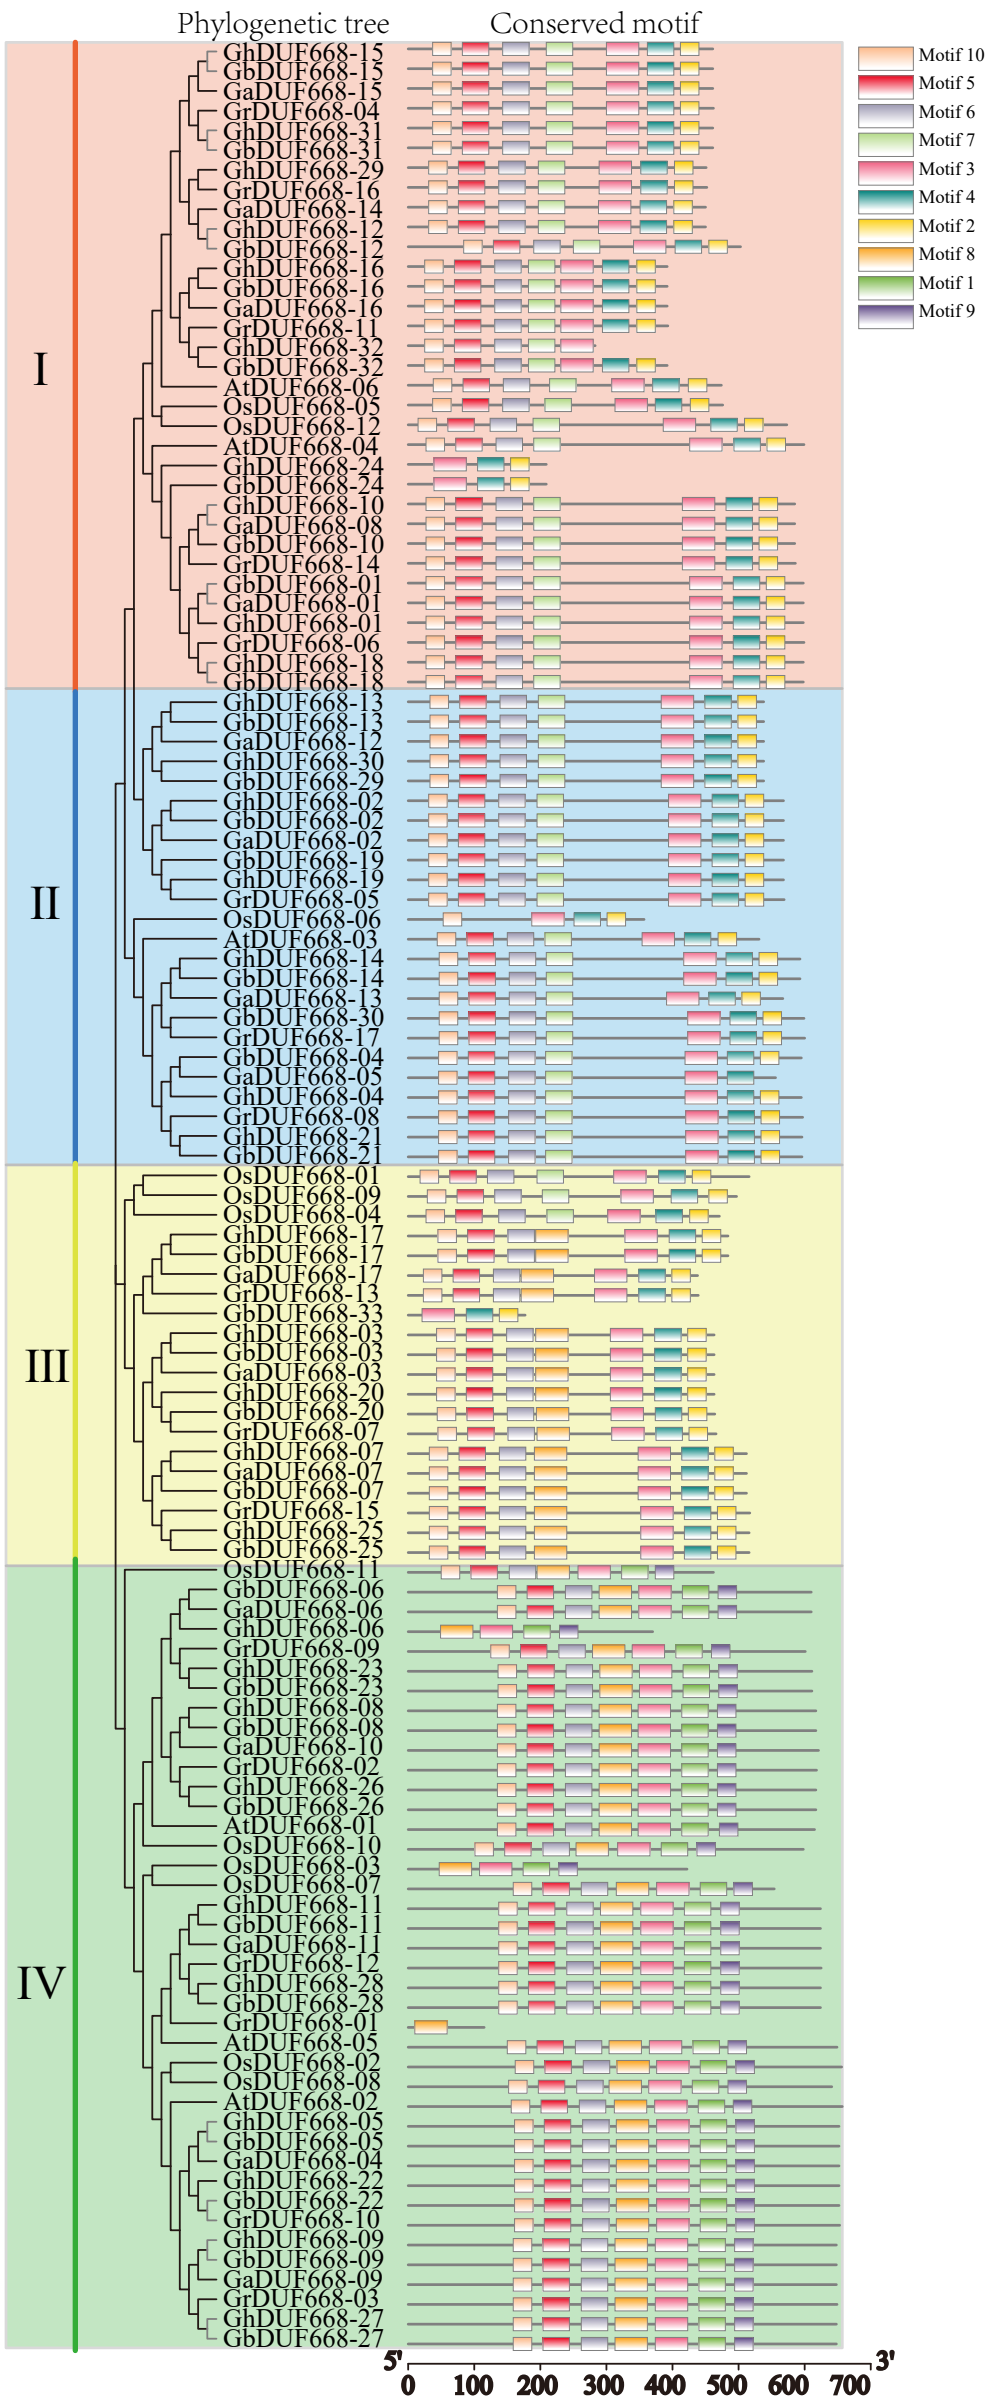

Supplement: 12864_2021_7716_MOESM5_ESM.pdf [file 12864_2021_7716_MOESM5_ESM.pdf]
